# Supplementary material for: Sustainable competitive adsorption of methylene blue and acid red 88 from synthetic wastewater using NiO and/or MgO silicate based nanosorbcats: experimental and computational modeling studies
Source: Royal Society of Chemistry journal article supplement (doi:10.1039/c9ra07001j), 2019-01-01
Supplement: c9ra07001j1.pdf [file c9ra07001j1.pdf]

## Electronic Supporting Information

### *Sustainable Competitive Adsorption of Methylene Blue and Acid Red 88 from Synthetic Wastewater using NiO and/or MgO Silicate Based Nanosorbents: Experimental and Computational Modeling Studies*

*Saqr Abuhatab<sup>ab</sup>, Amjad El-Qanni\*<sup>a</sup>, Nedal N. Marei<sup>b</sup>, Maryam Hmoudah<sup>a</sup>, Amer El-Hamouz<sup>a</sup>*

*<sup>a</sup> Chemical Engineering Department, An-Najah National University, Nablus, West Bank, Palestine*

*<sup>b</sup> Department of Chemical and Petroleum Engineering, University of Calgary, Calgary, Alberta, Canada*

\* (Tel.: + (970) 923-45113, Fax: + (970) 923-45982, E-mail: [a.elqanni@najah.edu](mailto:a.elqanni@najah.edu))

#### **S1. Adsorption isotherms models**

The experimental data were fitted using the Sips, Freundlich and Langmuir isotherm models for the single adsorption case. While the Extended-Sips model was used for binary systems. The models, assumptions, and the calculated coefficients are mentioned in Table S1.

#### **S2. Single adsorption isotherms results**

The adsorption experimental data were analyzed by different adsorption isothermal models. The model parameters for the single adsorption of the AR88 and MB molecules onto the SBNs are shown in **Table S2**. It is very clear from the calculations of  $\chi^2$  values that the Sips model better fits the experimental data than the Langmuir and Freundlich models. The  $\chi^2$  values for the applied Sips model ranged from 0.0058 to 0.0937 for MB and from 0.0720 to 0.0903 for AR88 in single systems.

**Table S1.** Adsorption isotherm models for single and multi-component (binary) systems.

| Adsorption model     | Nonlinear equation                                                                                   | Assumption(s)                                                                                                                                                                                                                                                  | Calculated coefficients                                                                                                                                                                                                                                                                        | Reference |
|----------------------|------------------------------------------------------------------------------------------------------|----------------------------------------------------------------------------------------------------------------------------------------------------------------------------------------------------------------------------------------------------------------|------------------------------------------------------------------------------------------------------------------------------------------------------------------------------------------------------------------------------------------------------------------------------------------------|-----------|
| <b>Langmuir</b>      | $Q_e = \frac{Q_m K_L C_e}{1 + K_L C_e}$                                                              | <ul style="list-style-type: none"> <li>- Single adsorption system.</li> <li>- Homogenous surface.</li> <li>- The attraction between the adsorbed model molecules is negligible.</li> <li>- Constant adsorption energy at all sites.</li> </ul>                 | <ul style="list-style-type: none"> <li>- <math>Q_e</math> is the adsorption capacity at equilibrium (<math>mg\ g^{-1}</math>).</li> <li>- <math>K_L</math> is the Langmuir constant related to the binding sites (<math>L\ mg^{-1}</math>).</li> </ul>                                         | 1         |
| <b>Freundlich</b>    | $Q_e = K_F C_e^{1/n}$                                                                                | <ul style="list-style-type: none"> <li>- Single adsorption system.</li> <li>- Heterogenous surface.</li> <li>- The possibility of interaction between the adsorbed molecules.</li> <li>- Different adsorption energies of sites.</li> </ul>                    | <ul style="list-style-type: none"> <li>- <math>K_F</math> is the Freundlich constant related to the adsorption capacity (<math>mg\ g^{-1})(L\ mg^{-1})^{n-1}</math></li> <li>- <math>1/n</math> is the adsorption intensity factor (unitless).</li> </ul>                                      | 2         |
| <b>Sips</b>          | $Q_e = \frac{Q_m (K_s C_e)^{n_s}}{1 + (K_s C_e)^{n_s}}$                                              | <ul style="list-style-type: none"> <li>- Single adsorption system.</li> <li>- Used to predict the heterogeneous adsorption system circumventing the limitation of the rising adsorbate concentration associated with the Freundlich isotherm model.</li> </ul> | <ul style="list-style-type: none"> <li>- <math>Q_m</math> is the maximum adsorbed amount (<math>mg\ g^{-1}</math>).</li> <li>- <math>K_s</math> is the Sips adsorption equilibrium constant (<math>L\ mg^{-1}</math>).</li> <li>- <math>n_s</math> is the Sips constant (unitless).</li> </ul> | 3, 4      |
| <b>Extended-Sips</b> | $Q_e = \frac{Q_m (K_{si} C_{ei})^{n_{si}}}{1 + (K_{si} C_{ei})^{n_{si}} + (K_{sj} C_{ej})^{n_{sj}}}$ | <ul style="list-style-type: none"> <li>- Multi-component adsorption system.</li> <li>- It is a competitive form of the Sips isotherm used in the presence of another species.</li> </ul>                                                                       | <ul style="list-style-type: none"> <li>- i and j represent the sorbate species.</li> </ul>                                                                                                                                                                                                     | 5, 6      |

**Table S2.** Single adsorption isotherm parameters.

|                       |             | <b>Langmuir isotherm</b>           |                   |                  |          |
|-----------------------|-------------|------------------------------------|-------------------|------------------|----------|
| <b>Model Molecule</b> | <b>SBNs</b> | $Q_m (mg g^{-1})$                  | $K_L (L mg^{-1})$ | $\chi^2$         |          |
| AR88                  | MgO         | 88.277                             | 0.0308            | 1.6712           |          |
|                       | NiO         | 64.851                             | 0.0194            | 1.1441           |          |
|                       | NiO-MgO     | 40.843                             | 0.0849            | 3.7659           |          |
| MB                    | MgO         | 43.317                             | 0.0237            | 0.6551           |          |
|                       | NiO         | 38.995                             | 0.0911            | 1.8922           |          |
|                       | NiO-MgO     | 47.399                             | 0.0849            | 0.4373           |          |
|                       |             | <b>Freundlich isotherm</b>         |                   |                  |          |
| <b>Model Molecule</b> | <b>SBNs</b> | $K_f (mg g^{-1})(L mg^{-1})^{n-1}$ | $n$ (unitless)    | $\chi^2$         |          |
| AR88                  | MgO         | 6.429                              | 0.49              | 0.7729           |          |
|                       | NiO         | 4.243                              | 0.47              | 0.4715           |          |
|                       | NiO-MgO     | 7.301                              | 0.32              | 0.1537           |          |
| MB                    | MgO         | 2.682                              | 0.53              | 0.0131           |          |
|                       | NiO         | 6.925                              | 0.35              | 0.1349           |          |
|                       | NiO-MgO     | 8.509                              | 0.37              | 0.3183           |          |
|                       |             | <b>Sips isotherm</b>               |                   |                  |          |
| <b>Model Molecule</b> | <b>SBNs</b> | $Q_m (mg g^{-1})$                  | $K_s(L mg^{-1})$  | $n_s$ (unitless) | $\chi^2$ |
| AR88                  | MgO         | 147.2                              | 0.0071            | 0.69             | 0.0720   |
|                       | NiO         | 111.1                              | 0.0039            | 0.66             | 0.0903   |
|                       | NiO-MgO     | 137.7                              | 0.0005            | 0.40             | 0.0840   |
| MB                    | MgO         | 56.6                               | 0.0111            | 0.80             | 0.0058   |
|                       | NiO         | 69.4                               | 0.0091            | 0.51             | 0.0082   |
|                       | NiO-MgO     | 81.4                               | 0.0164            | 0.57             | 0.0937   |

## References

1. I. Langmuir, *Journal of the American Chemical Society*, 1918, **40**, 1361-1403.
2. P. Senthil Kumar, S. Ramalingam, C. Senthamarai, M. Niranjanaa, P. Vijayalakshmi and S. Sivanesan, *Desalination*, 2010, **261**, 52-60.
3. K. Y. Foo and B. H. Hameed, *Chemical Engineering Journal*, 2010, **156**, 2-10.
4. J. Febrianto, A. N. Kosasih, J. Sunarso, Y.-H. Ju, N. Indraswati and S. Ismadji, *Journal of Hazardous Materials*, 2009, **162**, 616-645.
5. J. Zolgharnein, M. Bagtash and T. Shariatmanesh, *Spectrochimica Acta Part A: Molecular and Biomolecular Spectroscopy*, 2015, **137**, 1016-1028.
6. D. Kumar, A. Singh and J. P. Gaur, *Bioresource Technology*, 2008, **99**, 8280-8287.
